# Supplementary material for: Effects of exercise countermeasures on multisystem function in long duration spaceflight astronauts
Source: PubMed Central journal article supplement (PMC9898566; doi:10.1038/s41526-023-00256-5), 2023-02-03
Supplement: 41526_2023_256_MOESM1_ESM.pdf [file 41526_2023_256_MOESM1_ESM.pdf]

## **SUPPLEMENTAL MATERIAL**

### **Effects of Exercise Countermeasures on Multisystem Function in Long Duration Spaceflight Astronauts**

#### **Table of Contents**

- 1. Supplemental Figure 1.** The Second Generation Treadmill (T2) on ISS
- 2. Supplemental Figure 2.** Cycle Ergometer with Vibration Isolation System (CEVIS) on ISS
- 3. Supplemental Figure 3.** Advanced Resistive Exercise Device (ARED) on ISS
- 4. Supplemental Figure 4.** Inter-individual Heterogeneity in Response from Pre- to Post-flight
- 5. Supplemental Table 1.** In-flight Daily Caloric and Macronutrient Intake
- 6. Supplemental Table 2.** Data Collection Schedule and Astronaut Participation
- 7. Supplemental Table 3.** Pre and Postflight Bone Mineral Density and Content
- 8. Supplemental Table 4.** Pre and Postflight Muscle Strength and Size
- 9. Supplemental Table 5.** Pre and Postflight Cardiorespiratory Fitness
- 10. Supplemental Table 6.** Pre and Postflight Body Composition

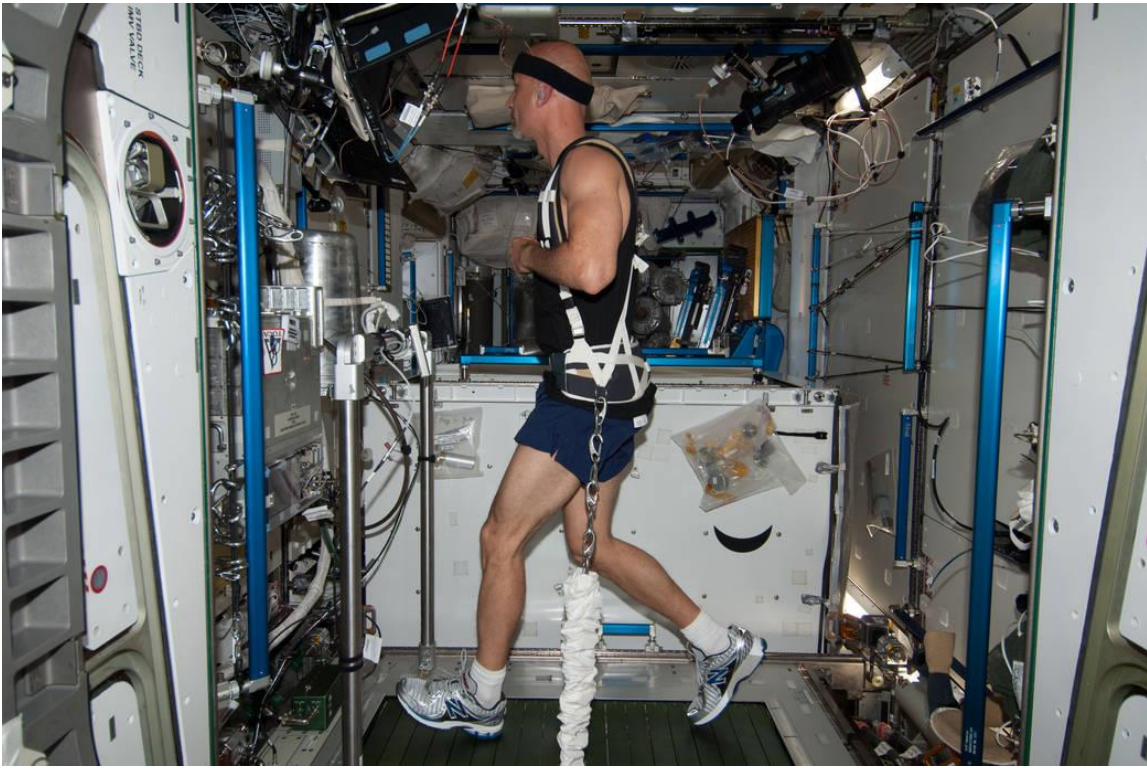

**Supplemental Figure 1. The Second Generation Treadmill (T2) on ISS.** NASA Image: ISS036-E-005384;  
<https://www.nasa.gov/multimedia/guidelines/index.html>

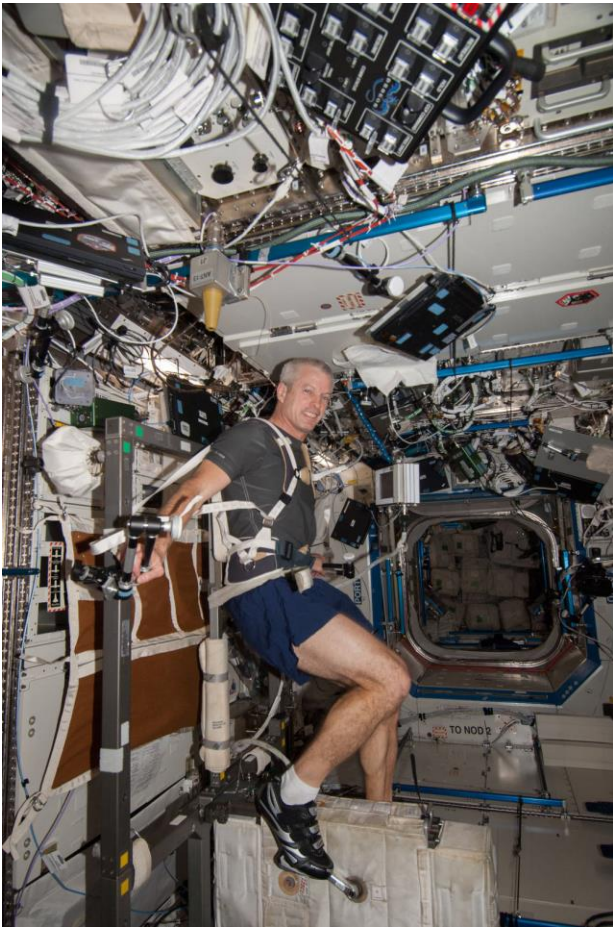

**Supplemental Figure 2. Cycle Ergometer with Vibration Isolation System (CEVIS) on ISS.** NASA Image: SS039-E-014696; <https://www.nasa.gov/multimedia/guidelines/index.html>

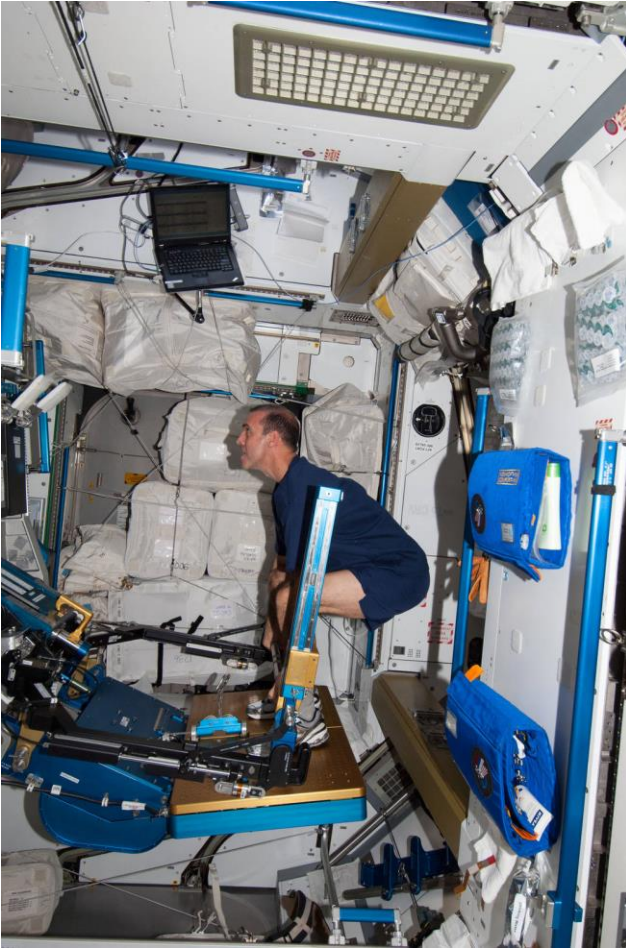

**Supplemental Figure 3. Advanced Resistive Exercise Device (ARED) on ISS.** NASA Image: ISS038-E-000281; <https://www.nasa.gov/multimedia/guidelines/index.html>

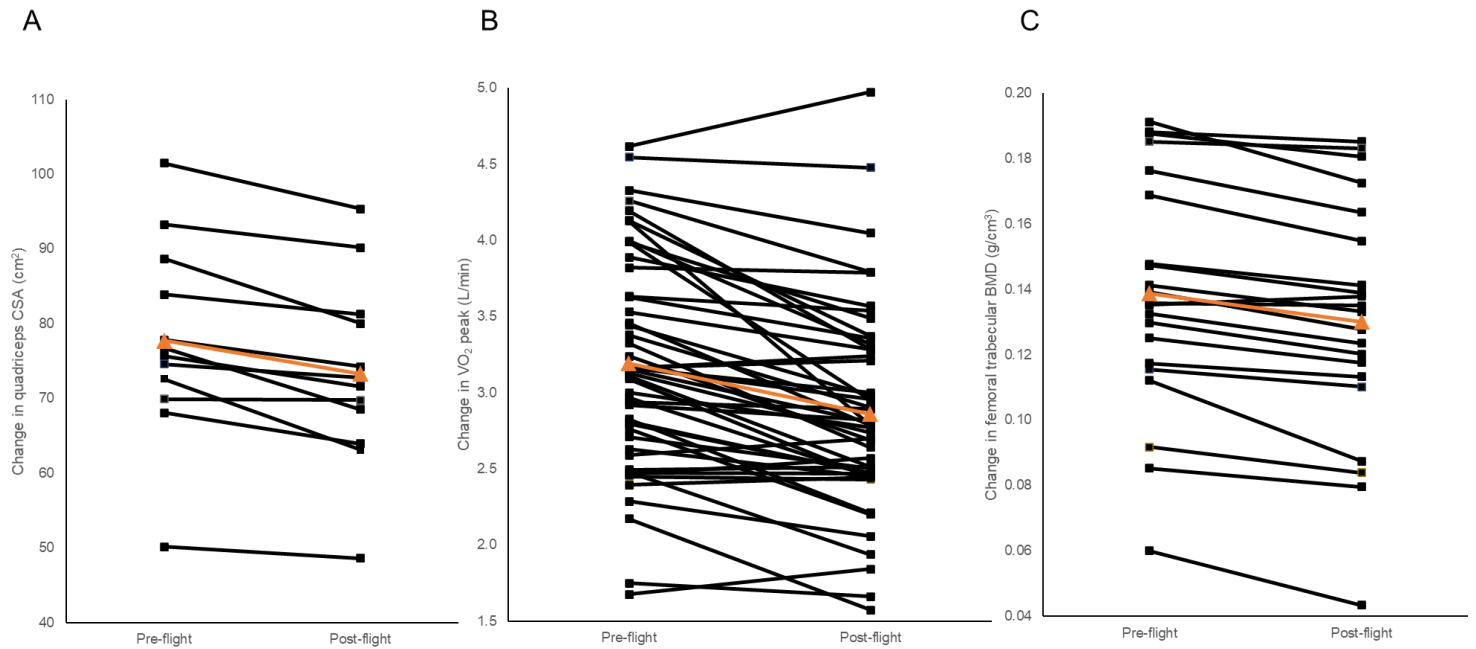

**Supplemental Figure 4. Inter-individual Heterogeneity in Response from Pre- to Post-flight.** (A) Individual responses for quadriceps size. (B) Individual responses for VO<sub>2</sub>peak. (C) Individual responses for bone content in trabecula femur. Abbreviations: CSA, cross sectional area; VO<sub>2</sub>peak, peak oxygen consumption; BMD, bone mineral density.

**Supplemental Table 1. In-flight Daily Caloric and Macronutrient Intake.**

|                       | <b>Total</b> | <b>Relative to body weight, kg</b> |
|-----------------------|--------------|------------------------------------|
| Total calories (kcal) | 2296 ± 449   | 29 ± 5                             |
| Protein (g)           | 112 ± 24     | 1.4 ± 0.3                          |

Values are expressed as means ± SD.

**Supplemental Table 2. Data Collection Schedule and Astronaut Participation.**

| <b>System</b>                                     | <b>N</b> | <b>Days before launch (preflight)</b> | <b>Days after Return (postflight)</b> | <b>Individual endpoints</b>                                   |
|---------------------------------------------------|----------|---------------------------------------|---------------------------------------|---------------------------------------------------------------|
| <b>Muscle strength, power, and size</b>           |          |                                       |                                       |                                                               |
| Isometric and ballistic leg press and bench press | 17       | 30, 85                                | 1, 7, 30                              | Leg press and bench press: force, power, total work           |
| One-repetition maximum leg press and bench press  | 38       | 60, 90                                | 1, 7                                  | Leg press and bench press 1-RM                                |
| Cross sectional area (MRI)                        | 12       | 40                                    | 1                                     | Quadriceps, hamstring, calf                                   |
| <b>Cardiorespiratory fitness</b>                  |          |                                       |                                       |                                                               |
|                                                   | 21       | 28, 90                                | 2, 7, 30                              | VO <sub>2</sub> peak, ventilatory threshold, ventilation      |
| <b>Body composition (DXA)</b>                     |          |                                       |                                       |                                                               |
| Muscle and fat mass                               | 44       | 90                                    | 7                                     | Total mass, fat mass, lean mass                               |
| Bone                                              | 44       | 90                                    | 7                                     | Total hip, trochanter, femoral neck, L1-L4:                   |
| <b>Bone volume (QCT)</b>                          |          |                                       |                                       |                                                               |
|                                                   | 12       | 90                                    | 7                                     | Cortical and trabecular total femur, trochanter, femoral neck |

Abbreviations: RM: repetition maximum; MRI, magnetic resonance imaging; DXA, Dual Energy X-ray Absorptiometry; QCT, quantitative computed tomography; L, lumbar.

**Supplemental Table 3. Pre and Postflight Bone Mineral Density and Content.**

|                                   | Preflight  | N  | Postflight | N  |
|-----------------------------------|------------|----|------------|----|
| DXA                               |            |    |            |    |
| Total hip (g/cm <sup>2</sup> )    | 1.04±0.10  | 44 | 1.00±0.11  | 44 |
| Trochanter (g/cm <sup>2</sup> )   | 0.77±0.09  | 44 | 0.75±0.10  | 44 |
| Femoral neck (g/cm <sup>2</sup> ) | 0.86±0.10  | 44 | 0.84±0.10  | 44 |
| L1-L4                             | 1.09±0.13  | 44 | 1.06±0.13  | 44 |
| QCT Trabecular                    |            |    |            |    |
| Total Femur (g/cm <sup>3</sup> )  | 0.143±0.03 | 12 | 0.137±0.03 | 12 |
| Trochanteric (g/cm <sup>3</sup> ) | 0.144±0.03 | 12 | 0.138±0.03 | 12 |
| Femoral neck (g/cm <sup>3</sup> ) | 0.133±0.04 | 12 | 0.122±0.04 | 12 |
| QCT Cortical                      |            |    |            |    |
| Total Femur (g/cm <sup>3</sup> )  | 0.519±0.05 | 12 | 0.513±0.05 | 12 |
| Trochanteric (g/cm <sup>3</sup> ) | 0.524±0.05 | 12 | 0.516±0.05 | 12 |
| Femoral neck (g/cm <sup>3</sup> ) | 0.554±0.07 | 12 | 0.552±0.07 | 12 |

Values are means ± SD. Abbreviations: DXA, dual-energy x-ray absorptiometry; QCT, quantitative computed tomography



**Supplemental Table 4. Pre and Postflight Muscle Strength and Size.**

|                                  | Preflight | N  | Postflight | N  |
|----------------------------------|-----------|----|------------|----|
| Leg Press Force (N)              | 2027±500  | 15 | 1912±486   | 17 |
| Leg Press Total Work (W)         | 8338±2198 | 14 | 7572±1985  | 17 |
| Leg Press Max Power (W)          | 1829±405  | 14 | 1647±370   | 17 |
| Leg Press 1-RM (lb)              | 639±154   | 38 | 614±144    | 39 |
| Bench Press Force (N)            | 966±278   | 16 | 945±247    | 17 |
| Bench Press Total Work (W)       | 3693±1147 | 16 | 3598±1169  | 17 |
| Bench Press Max Power (W)        | 849±244   | 16 | 838±280    | 17 |
| Bench Press 1-RM (lb)            | 181±46    | 38 | 186±49     | 37 |
| Hamstring CSA (cm <sup>2</sup> ) | 33.8±3.5  | 12 | 31.1±3.7   | 12 |
| Quad CSA (cm <sup>2</sup> )      | 77.7±13.2 | 12 | 73.3±12.5  | 12 |
| Calf CSA (cm <sup>2</sup> )      | 17.7±4.1  | 12 | 15.6       | 12 |

Values are mean ± SD. Abbreviations: RM, repetition maximum; CSA, cross sectional area.

**Supplemental Table 5. Pre and Postflight Cardiorespiratory Fitness.**

|                               | Preflight | N  | Postflight | N  |
|-------------------------------|-----------|----|------------|----|
| VO <sub>2</sub> peak (L/min)  | 3.16±0.05 | 26 | 2.93±0.06  | 21 |
| Ventilation (ml)              | 135.8±2.8 | 26 | 130.0±3.5  | 21 |
| Ventilatory Threshold (L/min) | 2.84±0.07 | 22 | 2.88±0.06  | 13 |

Values are mean ± SD. Abbreviations: VO<sub>2</sub>peak; peak oxygen consumption

**Supplemental Table 6. Pre and Postflight Body Composition.**

|                 | Preflight | N  | Postflight | N  |
|-----------------|-----------|----|------------|----|
| Total Mass (kg) | 78.3±9.8  | 44 | 78.0±10.2  | 44 |
| Fat (kg)        | 19.2±4.6  | 44 | 18.7±4.9   | 44 |
| Lean (kg)       | 56.2±7.8  | 44 | 56.5±8.3   | 44 |

Values are means ± SD.
